# Supplementary material for: Betting on Non-Invasive Brain Stimulation to Treat Gambling Disorder: A Systematic Review and Meta-Analysis
Source: MDPI journal article supplement (doi:10.3390/brainsci13040698), 2023-04-21
Supplement: s1 [file s1]

## Supplementary Materials – Section A: Research strategy

| Search Databases      | Search algorithm                                                                                                                                                                                                                                                                                                                                                                                                                                                                                                                                                                                                                                                                                                                                                                                                                                                                                                                                                                                                                                                                                                                                                                                                       | Records retrieved |
|-----------------------|------------------------------------------------------------------------------------------------------------------------------------------------------------------------------------------------------------------------------------------------------------------------------------------------------------------------------------------------------------------------------------------------------------------------------------------------------------------------------------------------------------------------------------------------------------------------------------------------------------------------------------------------------------------------------------------------------------------------------------------------------------------------------------------------------------------------------------------------------------------------------------------------------------------------------------------------------------------------------------------------------------------------------------------------------------------------------------------------------------------------------------------------------------------------------------------------------------------------|-------------------|
| <b>Pubmed</b>         | ("transcranial magnetic stimulation"[All Fields] OR "TMS"[All Fields] OR "repetitive transcranial magnetic stimulation"[All Fields] OR "rTMS"[All Fields] OR "theta burst stimulation"[All Fields] OR "TBS"[All Fields] OR "deep transcranial magnetic stimulation"[All Fields] OR "dTMS"[All Fields] OR "deepTMS"[All Fields] OR "transcranial direct current stimulation"[All Fields] OR "tDCS"[All Fields] OR "transcranial electrical stimulation"[All Fields] OR "tES"[All Fields] OR "transcranial alternating current stimulation"[All Fields] OR "tACS"[All Fields] OR "transcranial current stimulation"[All Fields] OR "tCS"[All Fields] OR "non invasive brain stimulation"[All Fields] OR "NIBS"[All Fields] OR "brain stimulation"[All Fields]) AND ("pathological gambling"[All Fields] OR "gamblers"[All Fields] OR "gambling"[All Fields] OR "gambling disorder"[All Fields] OR "GD"[All Fields]))                                                                                                                                                                                                                                                                                                     | 335               |
| <b>EMBASE</b>         | ('transcranial magnetic stimulation'/exp OR 'transcranial magnetic stimulation' OR 'tms'/exp OR tms OR 'repetitive transcranial magnetic stimulation'/exp OR 'repetitive transcranial magnetic stimulation' OR rtms/exp OR rtms OR 'theta burst stimulation'/exp OR 'theta burst stimulation' OR tbs/exp OR tbs OR 'deep transcranial magnetic stimulation'/exp OR 'deep transcranial magnetic stimulation' OR dtms/exp OR dtms OR deeptms/exp OR deeptms OR 'transcranial direct current stimulation'/exp OR 'transcranial direct current stimulation' OR tdcx/exp OR tdcx OR 'transcranial electrical stimulation'/exp OR 'tes'/exp OR tes OR 'transcranial alternating current stimulation'/exp OR 'transcranial alternating current stimulation' OR tacs/exp OR tacs OR 'transcranial current stimulation'/exp OR 'transcranial current stimulation' OR tcs/exp OR tcs OR 'non invasive brain stimulation'/exp OR 'non invasive brain stimulation' OR nibs/exp OR nibs OR 'brain stimulation'/exp OR 'brain stimulation') AND ('pathological gambling'/exp OR 'pathological gambling' OR gamblers/exp OR gamblers OR gambling/exp OR gambling OR 'gambling disorder'/exp OR 'gambling disorder' OR 'gd'/exp OR gd) | 688               |
| <b>Web of Science</b> | ((TS=('transcranial magnetic stimulation') OR TS=(tms) OR TS=('repetitive transcranial magnetic stimulation') OR TS=(rtms) OR TS=('theta burst stimulation') OR TS=(tbs) OR TS=('deep transcranial magnetic stimulation') OR TS=(dtms) OR TS=(deaptms) OR TS=('transcranial direct current stimulation') OR TS=(tdcx) OR TS=('transcranial electrical stimulation') OR TS=(tes) OR TS=('transcranial alternating current stimulation') OR TS=(tacs) OR TS=('transcranial current stimulation') OR TS=(tcs) OR TS=('non invasive brain stimulation') OR TS=(nibs) OR TS=('brain stimulation')) AND (TS=('pathological gambling') OR TS=(gamblers) OR TS=(gambling) OR TS=('gambling disorder') OR TS=(gd))))                                                                                                                                                                                                                                                                                                                                                                                                                                                                                                            | 400               |
| <b>Scopus</b>         | ((TITLE-ABS-KEY ("transcranial magnetic stimulation") OR TITLE-ABS-KEY (tms) OR TITLE-ABS-KEY ("repetitive transcranial magnetic stimulation") OR TITLE-ABS-KEY (rtms) OR TITLE-ABS-KEY ("theta burst stimulation") OR TITLE-ABS-KEY (tbs) OR TITLE-ABS-KEY ("deep transcranial magnetic stimulation") OR TITLE-ABS-KEY (dtms) OR TITLE-ABS-KEY (deeptms) OR TITLE-ABS-KEY ("transcranial direct current stimulation") OR TITLE-ABS-KEY (tdcx) OR TITLE-ABS-KEY ("transcranial electrical stimulation") OR TITLE-ABS-KEY (tes) OR TITLE-ABS-KEY ("transcranial alternating current stimulation") OR TITLE-ABS-KEY (tacs) OR TITLE-ABS-KEY ("transcranial current stimulation") OR TITLE-ABS-KEY (tcs) OR TITLE-ABS-KEY ("non invasive brain stimulation") OR TITLE-ABS-KEY (nibs) OR TITLE-ABS-KEY ("brain stimulation")) AND (TITLE-ABS-KEY ("pathological gambling") OR TITLE-ABS-KEY (gamblers) OR TITLE-ABS-KEY (gambling) OR TITLE-ABS-KEY ("gambling disorder") OR TITLE-ABS-KEY (gd))))                                                                                                                                                                                                                         | 3,614             |

**Table S1.** Details on the search strategy in the four screened databases.

## Section B: Data extraction notes

Cardullo et al. 2019 [103] – as post-treatment, we included measures at Day 60. Data were taken from the abstract, standard errors were transformed into standard deviations.

Del Mauro et al. preprint [98] – MATE scores were used to measure craving and BDI depression. Data were taken from Table 2.

Gay et al. 2017 [102] – We included the VAS of craving before and after stimulation since it was the only measure in which we had scores before and after NiBS. Data were taken from Table 2 (“Cue-induced craving”).

Pettorosso et al. 2020 [104] – T4 included post-treatment data (after intensive plus maintenance phases), data were taken from Table 2. We included PG-YBOCS and BDI as measures of craving and depressive symptoms, respectively.

Rosenberg et al. 2013 [105] – We included the VAS scores for craving and the HDRS for depressive symptoms. Mean, and SDs were calculated from Table 2.

Salerno et al. 2022 [106] – We included PG-YBOCS and HAMD scores and calculated mean and standard deviations from Table 1.

Zack et al. 2016 [81] – We asked for data by email, and the authors sent us data from the VAS administered before (Time 1) and after stimulation (Time 2).

## Section C: Sensitivity analyses

| <b>Correlation</b> | <b>SMCC</b> | <b>CI 95%</b>    | <b>p-value</b> |
|--------------------|-------------|------------------|----------------|
| <i>Corr = .25</i>  | -0.609      | -1.0875, -0.1297 | .012           |
| <i>Corr = .75</i>  | -0.835      | -1.434, -0.236   | .006           |

**Table S2.** Sensitivity analysis results on craving scores effects.

Correlation = values established between pre- and post-measurement variances (0.25, 0.75) (analyses in the main text were run setting a 0.5 correlation); SMCC = standardized mean change (effect size); CI = confidence interval.

### Section D: Risk of bias details for pre-post studies (Tables S3 – S7)

| <i>Table S3. Cardullo et al., 2019</i>                                                                                                                                                                                      |                  |      |                                                |
|-----------------------------------------------------------------------------------------------------------------------------------------------------------------------------------------------------------------------------|------------------|------|------------------------------------------------|
| <b>The National Institutes of Health (NIH) quality assessment tool for before-after (Pre-Post) study with no control group</b>                                                                                              |                  |      |                                                |
| <b>Website:</b> <a href="https://www.nhlbi.nih.gov/health-topics/study-quality-assessment-tools">https://www.nhlbi.nih.gov/health-topics/study-quality-assessment-tools</a>                                                 |                  |      |                                                |
| Major Components                                                                                                                                                                                                            | Response options |      |                                                |
| 1. Was the study question or objective clearly stated?                                                                                                                                                                      | Yes              | No   | Cannot Determine/ Not Applicable/ Not Reported |
| 2. Were eligibility/selection criteria for the study population prespecified and clearly described?                                                                                                                         | Yes              | No   | Cannot Determine/ Not Applicable/ Not Reported |
| 3. Were the participants in the study representative of those who would be eligible for the test/service/intervention in the general or clinical population of interest?                                                    | Yes              | No   | Cannot Determine/ Not Applicable/ Not Reported |
| 4. Were all eligible participants that met the prespecified entry criteria enrolled?                                                                                                                                        | Yes              | No   | Cannot Determine/ Not Applicable/ Not Reported |
| 5. Was the sample size sufficiently large to provide confidence in the findings?                                                                                                                                            | Yes              | No   | Cannot Determine/ Not Applicable/ Not Reported |
| 6. Was the test/service/intervention clearly described and delivered consistently across the study population?                                                                                                              | Yes              | No   | Cannot Determine/ Not Applicable/ Not Reported |
| 7. Were the outcome measures prespecified, clearly defined, valid, reliable, and assessed consistently across all study participants?                                                                                       | Yes              | No   | Cannot Determine/ Not Applicable/ Not Reported |
| 8. Were the people assessing the outcomes blinded to the participants' exposures/interventions?                                                                                                                             | Yes              | No   | Cannot Determine/ Not Applicable/ Not Reported |
| 9. Was the loss to follow-up after baseline 20% or less? Were those lost to follow-up accounted for in the analysis?                                                                                                        | Yes              | No   | Cannot Determine/ Not Applicable/ Not Reported |
| 10. Did the statistical methods examine changes in outcome measures from before to after the intervention? Were statistical tests done that provided p values for the pre-to-post changes?                                  | Yes              | No   | Cannot Determine/ Not Applicable/ Not Reported |
| 11. Were outcome measures of interest taken multiple times before the intervention and multiple times after the intervention (i.e., did they use an interrupted time-series design)?                                        | Yes              | No   | Cannot Determine/ Not Applicable/ Not Reported |
| 12. If the intervention was conducted at a group level (e.g., a whole hospital, a community, etc.) did the statistical analysis take into account the use of individual-level data to determine effects at the group level? | Yes              | No   | Cannot Determine/ Not Applicable/ Not Reported |
| <b>Quality Rating</b>                                                                                                                                                                                                       | Good             | Fair | Poor                                           |
| Additional Comments (If Poor, please state why):                                                                                                                                                                            |                  |      |                                                |

Table S4. Del Mauro et al. preprint

**The National Institutes of Health (NIH) quality assessment tool for before-after (Pre-Post) study with no control group**

**Website:** <https://www.nhlbi.nih.gov/health-topics/study-quality-assessment-tools>

| Major Components                                                                                                                                                                                                            | Response options |      |                                                |
|-----------------------------------------------------------------------------------------------------------------------------------------------------------------------------------------------------------------------------|------------------|------|------------------------------------------------|
| 1. Was the study question or objective clearly stated?                                                                                                                                                                      | Yes              | No   | Cannot Determine/ Not Applicable/ Not Reported |
| 2. Were eligibility/selection criteria for the study population prespecified and clearly described?                                                                                                                         | Yes              | No   | Cannot Determine/ Not Applicable/ Not Reported |
| 3. Were the participants in the study representative of those who would be eligible for the test/service/intervention in the general or clinical population of interest?                                                    | Yes              | No   | Cannot Determine/ Not Applicable/ Not Reported |
| 4. Were all eligible participants that met the prespecified entry criteria enrolled?                                                                                                                                        | Yes              | No   | Cannot Determine/ Not Applicable/ Not Reported |
| 5. Was the sample size sufficiently large to provide confidence in the findings?                                                                                                                                            | Yes              | No   | Cannot Determine/ Not Applicable/ Not Reported |
| 6. Was the test/service/intervention clearly described and delivered consistently across the study population?                                                                                                              | Yes              | No   | Cannot Determine/ Not Applicable/ Not Reported |
| 7. Were the outcome measures prespecified, clearly defined, valid, reliable, and assessed consistently across all study participants?                                                                                       | Yes              | No   | Cannot Determine/ Not Applicable/ Not Reported |
| 8. Were the people assessing the outcomes blinded to the participants' exposures/interventions?                                                                                                                             | Yes              | No   | Cannot Determine/ Not Applicable/ Not Reported |
| 9. Was the loss to follow-up after baseline 20% or less? Were those lost to follow-up accounted for in the analysis?                                                                                                        | Yes              | No   | Cannot Determine/ Not Applicable/ Not Reported |
| 10. Did the statistical methods examine changes in outcome measures from before to after the intervention? Were statistical tests done that provided p values for the pre-to-post changes?                                  | Yes              | No   | Cannot Determine/ Not Applicable/ Not Reported |
| 11. Were outcome measures of interest taken multiple times before the intervention and multiple times after the intervention (i.e., did they use an interrupted time-series design)?                                        | Yes              | No   | Cannot Determine/ Not Applicable/ Not Reported |
| 12. If the intervention was conducted at a group level (e.g., a whole hospital, a community, etc.) did the statistical analysis take into account the use of individual-level data to determine effects at the group level? | Yes              | No   | Cannot Determine/ Not Applicable/ Not Reported |
| <b>Quality Rating</b>                                                                                                                                                                                                       | Good             | Fair | Poor                                           |
| Additional Comments (If Poor, please state why):                                                                                                                                                                            |                  |      |                                                |

Table S5. Pettorruso et al., 2020

**The National Institutes of Health (NIH) quality assessment tool for before-after (Pre-Post) study with no control group**

**Website:** <https://www.nhlbi.nih.gov/health-topics/study-quality-assessment-tools>

| Major Components                                                                                                                                                                                                            | Response options |      |                                                |
|-----------------------------------------------------------------------------------------------------------------------------------------------------------------------------------------------------------------------------|------------------|------|------------------------------------------------|
| 1. Was the study question or objective clearly stated?                                                                                                                                                                      | Yes              | No   | Cannot Determine/ Not Applicable/ Not Reported |
| 2. Were eligibility/selection criteria for the study population prespecified and clearly described?                                                                                                                         | Yes              | No   | Cannot Determine/ Not Applicable/ Not Reported |
| 3. Were the participants in the study representative of those who would be eligible for the test/service/intervention in the general or clinical population of interest?                                                    | Yes              | No   | Cannot Determine/ Not Applicable/ Not Reported |
| 4. Were all eligible participants that met the prespecified entry criteria enrolled?                                                                                                                                        | Yes              | No   | Cannot Determine/ Not Applicable/ Not Reported |
| 5. Was the sample size sufficiently large to provide confidence in the findings?                                                                                                                                            | Yes              | No   | Cannot Determine/ Not Applicable/ Not Reported |
| 6. Was the test/service/intervention clearly described and delivered consistently across the study population?                                                                                                              | Yes              | No   | Cannot Determine/ Not Applicable/ Not Reported |
| 7. Were the outcome measures prespecified, clearly defined, valid, reliable, and assessed consistently across all study participants?                                                                                       | Yes              | No   | Cannot Determine/ Not Applicable/ Not Reported |
| 8. Were the people assessing the outcomes blinded to the participants' exposures/interventions?                                                                                                                             | Yes              | No   | Cannot Determine/ Not Applicable/ Not Reported |
| 9. Was the loss to follow-up after baseline 20% or less? Were those lost to follow-up accounted for in the analysis?                                                                                                        | Yes              | No   | Cannot Determine/ Not Applicable/ Not Reported |
| 10. Did the statistical methods examine changes in outcome measures from before to after the intervention? Were statistical tests done that provided p values for the pre-to-post changes?                                  | Yes              | No   | Cannot Determine/ Not Applicable/ Not Reported |
| 11. Were outcome measures of interest taken multiple times before the intervention and multiple times after the intervention (i.e., did they use an interrupted time-series design)?                                        | Yes              | No   | Cannot Determine/ Not Applicable/ Not Reported |
| 12. If the intervention was conducted at a group level (e.g., a whole hospital, a community, etc.) did the statistical analysis take into account the use of individual-level data to determine effects at the group level? | Yes              | No   | Cannot Determine/ Not Applicable/ Not Reported |
| <b>Quality Rating</b>                                                                                                                                                                                                       | Good             | Fair | Poor                                           |
| Additional Comments (If Poor, please state why):                                                                                                                                                                            |                  |      |                                                |

Table S6. Rosenberg et al., 2013

**The National Institutes of Health (NIH) quality assessment tool for before-after (Pre-Post) study with no control group**

**Website:** <https://www.nhlbi.nih.gov/health-topics/study-quality-assessment-tools>

| Major Components                                                                                                                                                                                                            | Response options |      |                                                |
|-----------------------------------------------------------------------------------------------------------------------------------------------------------------------------------------------------------------------------|------------------|------|------------------------------------------------|
| 1. Was the study question or objective clearly stated?                                                                                                                                                                      | Yes              | No   | Cannot Determine/ Not Applicable/ Not Reported |
| 2. Were eligibility/selection criteria for the study population prespecified and clearly described?                                                                                                                         | Yes              | No   | Cannot Determine/ Not Applicable/ Not Reported |
| 3. Were the participants in the study representative of those who would be eligible for the test/service/intervention in the general or clinical population of interest?                                                    | Yes              | No   | Cannot Determine/ Not Applicable/ Not Reported |
| 4. Were all eligible participants that met the prespecified entry criteria enrolled?                                                                                                                                        | Yes              | No   | Cannot Determine/ Not Applicable/ Not Reported |
| 5. Was the sample size sufficiently large to provide confidence in the findings?                                                                                                                                            | Yes              | No   | Cannot Determine/ Not Applicable/ Not Reported |
| 6. Was the test/service/intervention clearly described and delivered consistently across the study population?                                                                                                              | Yes              | No   | Cannot Determine/ Not Applicable/ Not Reported |
| 7. Were the outcome measures prespecified, clearly defined, valid, reliable, and assessed consistently across all study participants?                                                                                       | Yes              | No   | Cannot Determine/ Not Applicable/ Not Reported |
| 8. Were the people assessing the outcomes blinded to the participants' exposures/interventions?                                                                                                                             | Yes              | No   | Cannot Determine/ Not Applicable/ Not Reported |
| 9. Was the loss to follow-up after baseline 20% or less? Were those lost to follow-up accounted for in the analysis?                                                                                                        | Yes              | No   | Cannot Determine/ Not Applicable/ Not Reported |
| 10. Did the statistical methods examine changes in outcome measures from before to after the intervention? Were statistical tests done that provided p values for the pre-to-post changes?                                  | Yes              | No   | Cannot Determine/ Not Applicable/ Not Reported |
| 11. Were outcome measures of interest taken multiple times before the intervention and multiple times after the intervention (i.e., did they use an interrupted time-series design)?                                        | Yes              | No   | Cannot Determine/ Not Applicable/ Not Reported |
| 12. If the intervention was conducted at a group level (e.g., a whole hospital, a community, etc.) did the statistical analysis take into account the use of individual-level data to determine effects at the group level? | Yes              | No   | Cannot Determine/ Not Applicable/ Not Reported |
| <b>Quality Rating</b>                                                                                                                                                                                                       | Good             | Fair | Poor                                           |
| Additional Comments (If Poor, please state why): On patient was treated twice, inclusion/eligibility criteria of included participants and follow-ups were not clear                                                        |                  |      |                                                |

Table S7. Salerno et al. 2022

**Q. The National Institutes of Health (NIH) quality assessment tool for before-after (Pre-Post) study with no control group**

**Website:** <https://www.nhlbi.nih.gov/health-topics/study-quality-assessment-tools>

| Major Components                                                                                                                                                                                                            | Response options |      |                                                |
|-----------------------------------------------------------------------------------------------------------------------------------------------------------------------------------------------------------------------------|------------------|------|------------------------------------------------|
| 1. Was the study question or objective clearly stated?                                                                                                                                                                      | Yes              | No   | Cannot Determine/ Not Applicable/ Not Reported |
| 2. Were eligibility/selection criteria for the study population prespecified and clearly described?                                                                                                                         | Yes              | No   | Cannot Determine/ Not Applicable/ Not Reported |
| 3. Were the participants in the study representative of those who would be eligible for the test/service/intervention in the general or clinical population of interest?                                                    | Yes              | No   | Cannot Determine/ Not Applicable/ Not Reported |
| 4. Were all eligible participants that met the prespecified entry criteria enrolled?                                                                                                                                        | Yes              | No   | Cannot Determine/ Not Applicable/ Not Reported |
| 5. Was the sample size sufficiently large to provide confidence in the findings?                                                                                                                                            | Yes              | No   | Cannot Determine/ Not Applicable/ Not Reported |
| 6. Was the test/service/intervention clearly described and delivered consistently across the study population?                                                                                                              | Yes              | No   | Cannot Determine/ Not Applicable/ Not Reported |
| 7. Were the outcome measures prespecified, clearly defined, valid, reliable, and assessed consistently across all study participants?                                                                                       | Yes              | No   | Cannot Determine/ Not Applicable/ Not Reported |
| 8. Were the people assessing the outcomes blinded to the participants' exposures/interventions?                                                                                                                             | Yes              | No   | Cannot Determine/ Not Applicable/ Not Reported |
| 9. Was the loss to follow-up after baseline 20% or less? Were those lost to follow-up accounted for in the analysis?                                                                                                        | Yes              | No   | Cannot Determine/ Not Applicable/ Not Reported |
| 10. Did the statistical methods examine changes in outcome measures from before to after the intervention? Were statistical tests done that provided p values for the pre-to-post changes?                                  | Yes              | No   | Cannot Determine/ Not Applicable/ Not Reported |
| 11. Were outcome measures of interest taken multiple times before the intervention and multiple times after the intervention (i.e., did they use an interrupted time-series design)?                                        | Yes              | No   | Cannot Determine/ Not Applicable/ Not Reported |
| 12. If the intervention was conducted at a group level (e.g., a whole hospital, a community, etc.) did the statistical analysis take into account the use of individual-level data to determine effects at the group level? | Yes              | No   | Cannot Determine/ Not Applicable/ Not Reported |
| <b>Quality Rating</b>                                                                                                                                                                                                       | Good             | Fair | Poor                                           |
| Additional Comments (If Poor, please state why):                                                                                                                                                                            |                  |      |                                                |

### Section E: Participants' inclusion and exclusion criteria across papers

| References              | Inclusion criteria                                                      | Exclusion criteria                                                                                                                                                                                       |
|-------------------------|-------------------------------------------------------------------------|----------------------------------------------------------------------------------------------------------------------------------------------------------------------------------------------------------|
| Cardullo et al. [103]   | CUD in comorbidity with GD                                              | History of other psychiatric diseases, alcohol, and other SUDs (excluding cocaine and tobacco), personality disorders, and unstable medical illness                                                      |
| Del Mauro et al. [98]   | Diagnosis of GD                                                         | No psychiatric comorbidity                                                                                                                                                                               |
| Gay et al. [102]        | Diagnosis of GD                                                         | Comorbidity with other SUDs (excluding nicotine), psychiatric disorders, unstable psychiatric medications                                                                                                |
| Martinotti et al. [100] | Age 18-65 years; current diagnosis of SUDs or GD                        | No comorbid diagnosis of bipolar disorder, schizophrenia, or other psychotic disorders; no history of seizures or neurological disorders; no current use of pro convulsant drugs; stable pharmacotherapy |
| Pettorruso et al. [104] | Medically healthy, drug-free, or under a stable pharmacological regimen | Severe psychiatric comorbidity, current alcohol, or SUDs comorbidity (except nicotine), any neurological disorder                                                                                        |
| Rosenberg et al. [105]  | Diagnosis of GD                                                         | SUDs                                                                                                                                                                                                     |
| Salerno et al. [106]    | GD for at least one year and a PG-YBOCS score $\geq 16$                 | No comorbidity for mood disorders, the presence of a risk of seizure or epilepsy, implanted devices, metal in the brain, and neurological disorders                                                      |
| Sauvaget et al. [101]   | Right-handed, GD diagnosis                                              | Comorbidity with SUDs, AUD, cognitive impairment, neurological disease, epilepsy brain injury, brain surgery, medications likely to modify the seizure threshold                                         |
| Soyata et al. [99]      | GD diagnosis, age between 18 and 65, right-handed, drug-free            | Current diagnosis of major depressive disorder, current or previous AUD or SUDs (including tobacco), psychotic disorders, neurological disorder, use of psychotropic medications                         |
| Zack et al. [81]        | Diagnosis of GD                                                         | Axis I comorbidity, current use of drugs or psychoactive medications                                                                                                                                     |

**Table S8.** Inclusion and exclusion criteria of participants within the analyzed papers.

Alcohol Use Disorder (AUD); Cocaine Use Disorder (CUD); Diagnostic and Statistical Manual (DSM); Gambling Disorder (GD); Male (M); Pathological Gambling Yale-Brown Obsessive Compulsive Scale (PG-YBOCS); Substance Use Disorders (SUDs).
